# Supplementary material for: Two-year analysis of Clostridium difficile ribotypes associated with increased severity
Source: PubMed Central journal article supplement (PMC6926500; doi:10.1016/j.jhin.2019.06.003), 2019-12
Supplement: mmc1.pdf [file mmc1.pdf]

**Supplementary Data Two year analysis of *Clostridium difficile* ribotypes associated with increased severity**

**Table S1**

Routine data associated with RT220 episodes (N=21 patients; 23 episodes)

|    | Age range (years) | Sex | Speciality <sup>a</sup> | Toxin EIA result | LoS (days) prior to sample | Death within 30 days | Primary diagnosis (ICD-10)    |
|----|-------------------|-----|-------------------------|------------------|----------------------------|----------------------|-------------------------------|
| 1  | 31–40             | F   | Medical                 | Negative         | 0                          | Unk                  | Intestinal infection          |
| 2  | 31–40             | F   | Surgical                | Not done         | 5                          | Unk                  | Fractured spine               |
| 3  | 51–60             | F   | Medical                 | Positive         | 4                          | No                   | Intestinal infection          |
| 4  | 61–70             | F   | Gynae                   | Negative         | 5                          | No                   | Ovarian cancer                |
| 5  | 61–70             | M   | ED                      | Positive         | 0                          | No                   | Unk                           |
| 6  | 61–70             | F   | Renal                   | Negative         | 1                          | Unk                  | Pneumonia                     |
| 7  | 61–70             | M   | Surgical                | Positive         | 6                          | Unk                  | Hepatobiliary cancer          |
| 8  | 61–70             | F   | Medical                 | Not done         | 0                          | No                   | Unk                           |
| 9  | 71–80             | F   | ED                      | Positive         | 0                          | No                   | Unk                           |
| 9  | 71–80             | F   | Medical                 | Positive         | 10                         | No                   | Depressive disorder           |
| 9  | 71–80             | F   | GP                      | Positive         | NA                         | No                   | Unk                           |
| 10 | 71–80             | M   | Medical                 | Negative         | 0                          | Yes                  | Pneumonia                     |
| 11 | 71–80             | M   | GP                      | Negative         | NA                         | Unk                  | Unk                           |
| 12 | 71–80             | F   | Medical                 | Positive         | 15                         | Yes                  | Urosepsis                     |
| 13 | 71–80             | F   | GP                      | Positive         | NA                         | Yes                  | Unk                           |
| 14 | 71–80             | F   | Medical                 | Positive         | 5                          | Yes                  | Pneumonia                     |
| 15 | 71–80             | F   | Surgical                | Negative         | 1                          | No                   | Urosepsis                     |
| 16 | 81–90             | M   | Surgical                | Positive         | 25                         | Unk                  | Unk                           |
| 17 | 81–90             | F   | Surgical                | Positive         | 5                          | Yes                  | Lower gastrointestinal cancer |
| 18 | 91–100            | F   | GP                      | Positive         | NA                         | No                   | Unk                           |
| 19 | 91–100            | M   | Medical                 | Positive         | 19                         | Yes                  | Cerebral infarction           |
| 20 | 91–100            | F   | ICU                     | Negative         | 17                         | Yes                  | Unk                           |
| 21 | 91–100            | F   | Medical                 | Positive         | 1                          | No                   | Unk                           |

EIA, enzyme immunoassay; ED, emergency department; GP, general practice; ICU, intensive care unit; F, female; M, male; LoS, length of stay prior to *Clostridium difficile* sample submission; NA, not admitted; Unk, unknown; ICD-10, International Classification of Diseases-10.

Mortality data unknown for six of 21 patients as unable to link to national databases/lack of correct NHS number.

Primary ICD-10 diagnosis unknown for 10 of 23 RT220 episodes if not admitted/not admitted to university hospital group.

## Supplementary Data Two year analysis of *Clostridium difficile* ribotypes associated with increased severity

<sup>a</sup>Clinical team submitting sample for *C. difficile* testing at time of diagnosis.

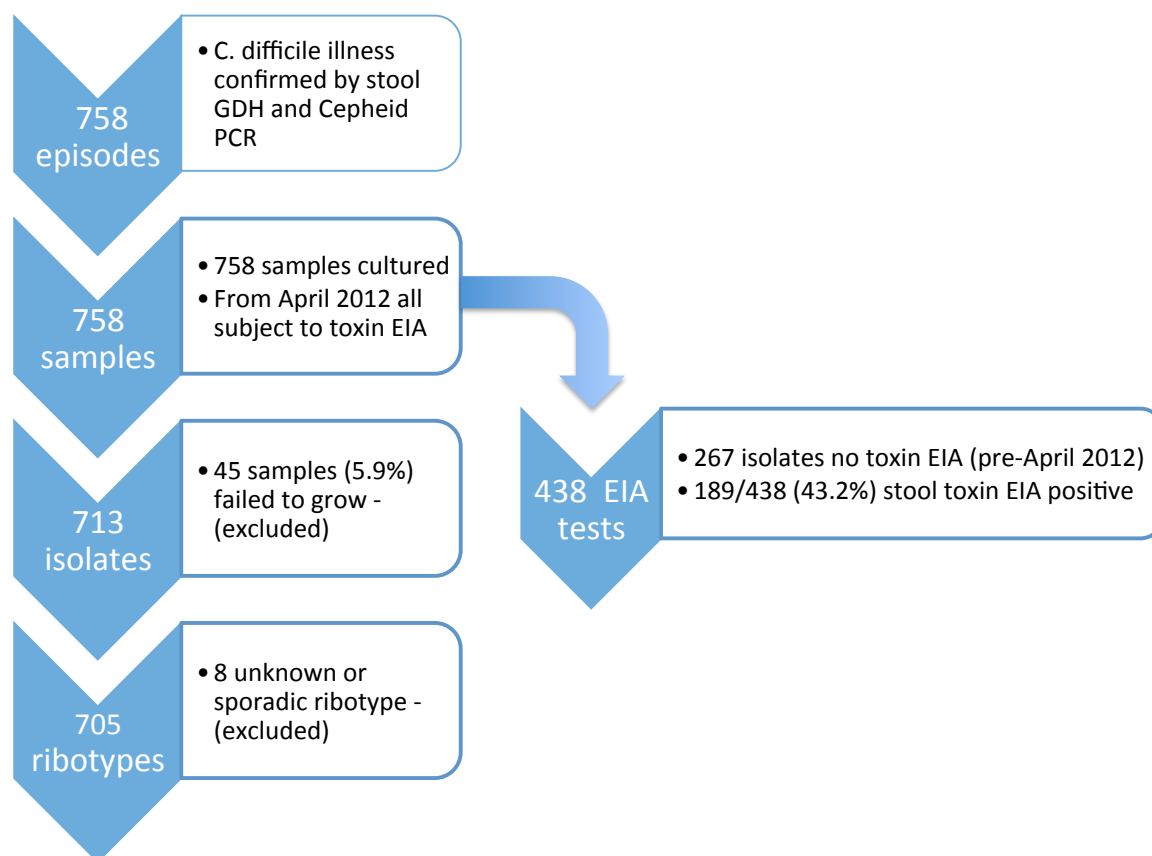

**Figure S1.** Flow chart outlining inclusion of episodes, isolates and toxin testing. *C. difficile*, *Clostridium difficile*; GDH, glutamate dehydrogenase; PCR, polymerase chain reaction; EIA, enzyme immunoassay.

Supplementary Data Two year analysis of *Clostridium difficile* ribotypes associated with increased severity

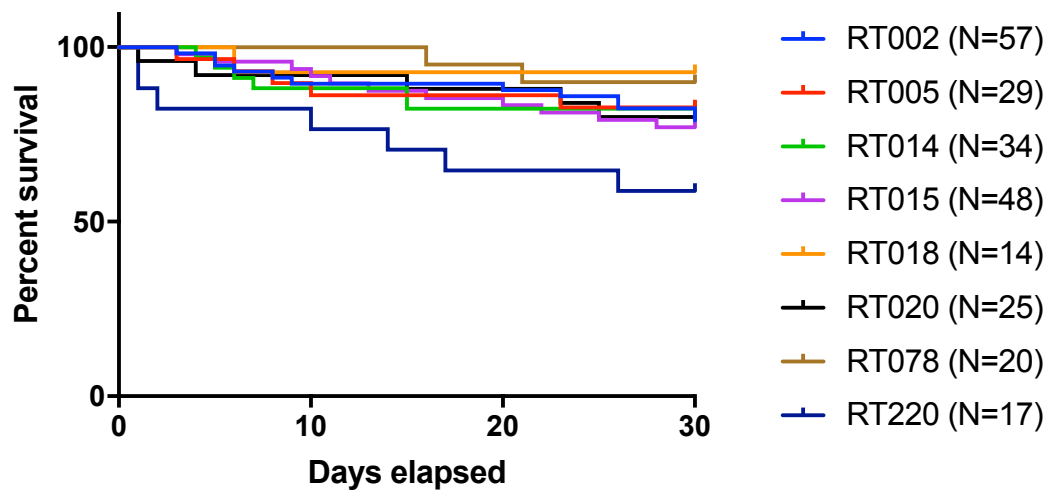

**Figure S2.** Kaplan–Meier survival plot of 30-day all-cause mortality from date of *Clostridium difficile* sampling by prevalent ribotypes ( $N$ =number of episodes for which mortality/survival data were available) for ribotypes with prevalence >3%.

## Supplementary Data Two year analysis of *Clostridium difficile* ribotypes associated with increased severity

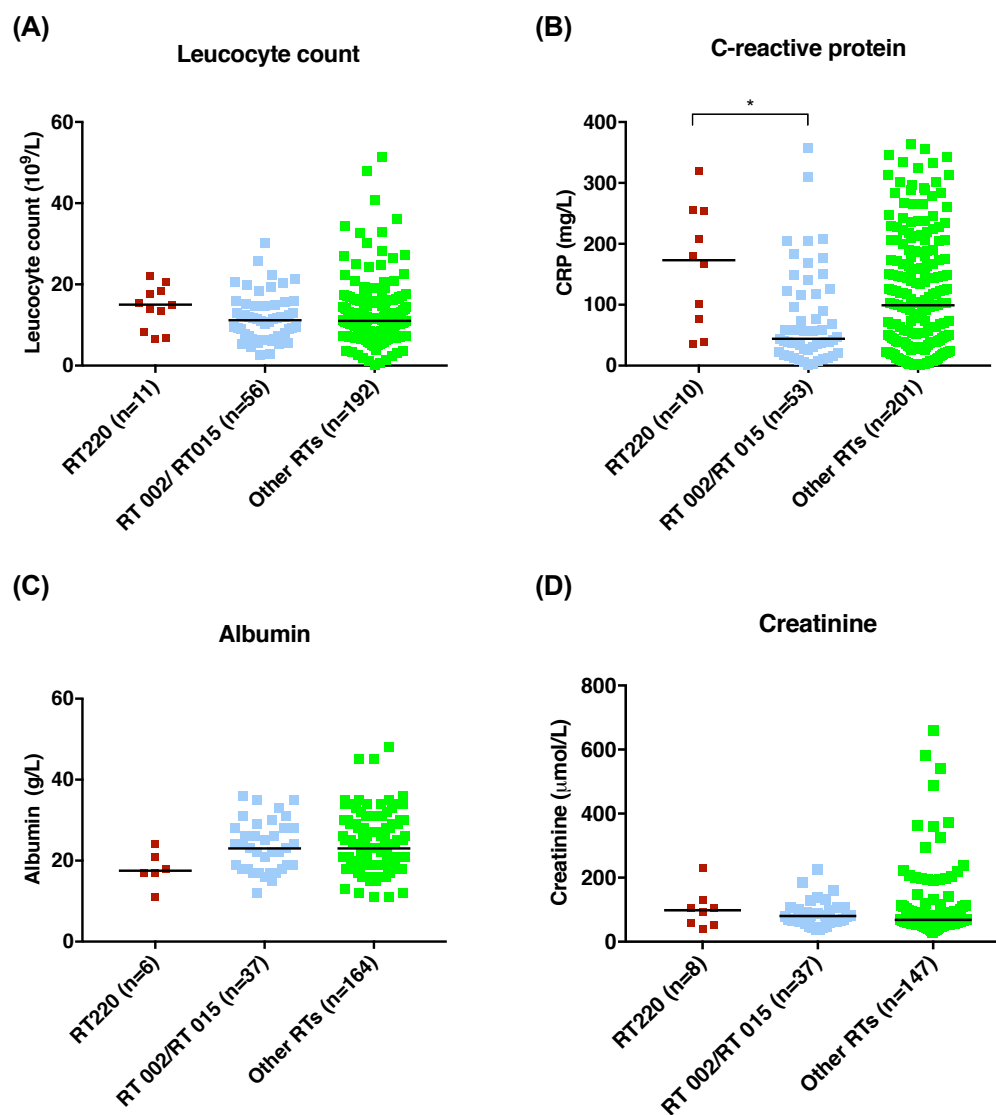

**Figure S3.** Biomarkers at time of diagnosis of each *Clostridium difficile* episode compared by ribotype. (A) Leucocyte count recorded within 48 h of sampling (normal range 3.6–11.0 10<sup>9</sup>/L); no significant association between RT220 and leukocyte count recorded when compared with other ribotypes ( $P=0.22$ ). (B) C-reactive protein (CRP) recorded within 48 h of sampling (normal range <5 mg/dL); RT220 was associated with an elevated median CRP of 173 mg/L ( $P=0.008$ ). (C) Albumin recorded within 48 h of sampling (normal range 35–55 g/L); RT220 showed a trend towards reduced albumin when compared with RT002/RT015 and all other ribotypes ( $P=0.07$ ). (D) Creatinine (excluding renal patients)

**Supplementary Data Two year analysis of *Clostridium difficile* ribotypes associated with increased severity**

recorded within 48 h of sampling (normal range 45–110  $\mu\text{mol/L}$ ); no significant associations between RT220 when compared with other ribotypes ( $P=0.36$ ). Each dot represents a unique *C. difficile* episode where biomarkers were available. Horizontal line represents median value. \* $P$ -value  $<0.05$  (Kruskall–Wallis).
